# Supplementary material for: On the Cl⋯C halogen bond: a rotational study of CF3Cl–CO
Source: Royal Society of Chemistry journal article supplement (doi:10.1039/c6cp01059h), 2016-01-01
Supplement: c6cp01059h1.pdf [file c6cp01059h1.pdf]

# On the Cl $\cdots$ C halogen bond: a rotational study of CF<sub>3</sub>Cl $\cdots$ CO

## Electronic Supplementary Information

**Content:**

Table of transition frequencies.

**Table 1:** Experimental transition frequencies ( $\nu$ ) and discrepancies between observed and calculated frequencies ( $\Delta\nu$ ) of the  $\text{CF}_3^{35}\text{Cl-CO}$  and  $\text{CF}_3^{37}\text{Cl-CO}$  complexes.

| $J''$ | $K''$ | $F''$ | $F'$ | $\text{CF}_3^{35}\text{Cl-CO}$ |                        | $\text{CF}_3^{37}\text{Cl-CO}$ |                        |
|-------|-------|-------|------|--------------------------------|------------------------|--------------------------------|------------------------|
|       |       |       |      | $\nu_{\text{obs}}/\text{MHz}$  | $\Delta\nu/\text{kHz}$ | $\nu_{\text{obs}}/\text{MHz}$  | $\Delta\nu/\text{kHz}$ |
| 6     | 0     | 6     | 5    | 7449.0078                      | 0.8                    | 7448.2707                      | 0.8                    |
| 6     | 0     | 5     | 4    | 7449.0078                      | -2.7                   | 7448.2707                      | -1.5                   |
| 6     | 0     | 7     | 6    | 7449.8916                      | 0.3                    | 7448.9674                      | -1.3                   |
| 6     | 0     | 8     | 7    | 7449.8916                      | -0.9                   | 7448.9674                      | -2.1                   |
| 7     | 0     | 7     | 6    | 8690.6060                      | 0.6                    | 8689.6885                      | 1.0                    |
| 7     | 0     | 6     | 5    | 8690.6060                      | -1.4                   | 8689.6885                      | -0.3                   |
| 7     | 0     | 8     | 7    | 8691.2401                      | 1.1                    | 8690.1872                      | -1.0                   |
| 7     | 0     | 9     | 8    | 8691.2401                      | 0.2                    | 8690.1872                      | -1.6                   |
| 8     | 0     | 8     | 7    | 9932.0489                      | 1.3                    | 9930.9641                      | -0.3                   |
| 8     | 0     | 7     | 6    | 9932.0489                      | 0.0                    | 9930.9641                      | -1.1                   |
| 8     | 0     | 9     | 8    | 9932.5256                      | 0.6                    | 9931.3397                      | -2.0                   |
| 8     | 0     | 10    | 9    | 9932.5256                      | 0.0                    | 9931.3497                      | 7.6                    |
| 9     | 0     | 9     | 8    | 11173.3560                     | 0.3                    | 11172.1146                     | -1.0                   |
| 9     | 0     | 8     | 7    | 11173.3560                     | -0.5                   | 11172.1146                     | -1.6                   |
| 9     | 0     | 10    | 9    | 11173.7302                     | 1.4                    | 11172.4091                     | -1.4                   |
| 9     | 0     | 11    | 10   | 11173.7302                     | 1.0                    | 11172.4091                     | -1.6                   |
| 10    | 0     | 10    | 9    | 12414.5314                     | -2.3                   | 12413.1423                     | 0.4                    |
| 10    | 0     | 9     | 8    | 12414.5344                     | 0.0                    | 12413.1423                     | -0.0                   |
| 10    | 0     | 11    | 10   | 12414.8360                     | 2.3                    | 12413.3801                     | 1.2                    |
| 10    | 0     | 12    | 11   | 12414.8360                     | 2.0                    | 12413.3801                     | 1.0                    |
| 11    | 0     | 11    | 10   | 13655.5768                     | -1.7                   | 13654.0370                     | -1.1                   |
| 11    | 0     | 10    | 9    | 13655.5768                     | -2.1                   | 13654.0370                     | -1.4                   |
| 11    | 0     | 12    | 11   | 13655.8257                     | 0.8                    | 13654.2333                     | 0.5                    |
| 11    | 0     | 13    | 12   | 13655.8257                     | 0.5                    | 13654.2333                     | 0.3                    |
| 12    | 0     | 12    | 11   | 14896.4822                     | -0.3                   |                                |                        |
| 12    | 0     | 11    | 10   | 14896.4822                     | -0.7                   |                                |                        |
| 12    | 0     | 13    | 12   | 14896.6881                     | -0.6                   |                                |                        |
| 12    | 0     | 14    | 13   | 14896.6881                     | -0.8                   |                                |                        |
| 13    | 0     | 13    | 12   | 16137.2354                     | -1.4                   |                                |                        |
| 13    | 0     | 12    | 11   | 16137.2354                     | -1.7                   |                                |                        |
| 13    | 0     | 14    | 13   | 16137.4113                     | -0.6                   |                                |                        |
| 13    | 0     | 15    | 14   | 16137.4113                     | -0.7                   |                                |                        |
| 14    | 0     | 14    | 13   | 17377.8308                     | -0.4                   |                                |                        |
| 14    | 0     | 13    | 12   | 17377.8308                     | -0.6                   |                                |                        |
| 14    | 0     | 15    | 14   | 17377.9808                     | -1.0                   |                                |                        |
| 6     | 1     | 6     | 5    | 7448.6297                      | -1.2                   | 7447.9259                      | 2.3                    |
| 6     | 1     | 5     | 4    | 7449.1768                      | -0.7                   | 7448.3565                      | -0.0                   |
| 6     | 1     | 7     | 6    | 7449.2920                      | -1.0                   | 7448.4438                      | -3.5                   |
| 7     | 1     | 7     | 6    | 8690.2267                      | -0.0                   | 8689.3304                      | -0.9                   |
| 7     | 1     | 6     | 5    | 8690.5666                      | -2.1                   | 8689.6019                      | -0.2                   |
| 7     | 1     | 8     | 7    | 8690.7438                      | 0.7                    | 8689.7374                      | -2.2                   |
| 7     | 1     | 9     | 8    | 8691.0889                      | 0.4                    | 8690.0106                      | -1.9                   |
| 8     | 1     | 8     | 7    | 9931.6553                      | -1.0                   | 9930.5926                      | 2.3                    |
| 8     | 1     | 7     | 6    | 9931.8848                      | 0.3                    | 9930.7704                      | -0.5                   |
| 8     | 1     | 9     | 8    | 9932.0660                      | 0.1                    | 9930.9142                      | 0.0                    |
| 8     | 1     | 10    | 9    | 9932.2968                      | 0.7                    | 9931.0950                      | -1.0                   |
| 9     | 1     | 9     | 8    | 11172.9429                     | -0.7                   | 11171.7168                     | -0.2                   |
| 9     | 1     | 8     | 7    | 11173.1042                     | 0.7                    | 11171.8432                     | -0.4                   |
| 9     | 1     | 10    | 9    | 11173.2747                     | -0.0                   | 11171.9771                     | -1.7                   |
| 9     | 1     | 11    | 10   | 11173.4367                     | 0.8                    | 11172.1150                     | 8.8                    |
| 10    | 1     | 10    | 9    | 12414.0970                     | 1.5                    | 12412.7153                     | 0.7                    |
| 10    | 1     | 9     | 8    | 12414.2122                     | 0.4                    | 12412.8075                     | 0.8                    |
| 10    | 1     | 11    | 10   | 12414.3692                     | 1.2                    | 12412.9318                     | 1.8                    |
| 11    | 1     | 11    | 10   | 13655.1121                     | 2.0                    | 13653.5766                     | -2.2                   |
| 11    | 1     | 10    | 9    | 13655.1975                     | 0.1                    | 13653.6482                     | 0.2                    |
| 11    | 1     | 12    | 11   | 13655.3360                     | -1.9                   | 13653.7579                     | -1.0                   |
| 11    | 1     | 13    | 12   | 13655.4257                     | -0.0                   | 13653.8268                     | -1.6                   |
| 7     | 3     | 8     | 7    | 8686.7761                      | -3.3                   |                                |                        |
| 7     | 2     | 7     | 6    | 8689.0908                      | 0.1                    |                                |                        |
| 7     | 2     | 8     | 7    | 8689.2549                      | -1.0                   |                                |                        |
| 7     | 3     | 9     | 8    | 8689.8725                      | -3.1                   |                                |                        |
| 7     | 2     | 6     | 5    | 8690.4502                      | -3.4                   |                                |                        |
| 7     | 2     | 9     | 8    | 8690.6320                      | -1.9                   |                                |                        |
| 8     | 3     | 9     | 8    | 9928.3960                      | 1.0                    |                                |                        |
| 8     | 3     | 8     | 7    | 9928.5231                      | -2.1                   |                                |                        |
| 8     | 3     | 10    | 9    | 9930.4570                      | -2.2                   |                                |                        |
| 8     | 2     | 8     | 7    | 9930.4847                      | 2.2                    |                                |                        |
| 8     | 2     | 9     | 8    | 9930.6886                      | -0.3                   |                                |                        |

|    |   |    |    |            |      |  |  |
|----|---|----|----|------------|------|--|--|
| 8  | 2 | 7  | 6  | 9931.3925  | 0.7  |  |  |
| 8  | 2 | 10 | 9  | 9931.6065  | -0.8 |  |  |
| 9  | 3 | 10 | 9  | 11169.6451 | 1.0  |  |  |
| 9  | 3 | 11 | 10 | 11171.0909 | 1.8  |  |  |
| 9  | 2 | 9  | 8  | 11171.7086 | 0.9  |  |  |
| 9  | 2 | 10 | 9  | 11171.9143 | 1.1  |  |  |
| 9  | 2 | 8  | 7  | 11172.3442 | -0.3 |  |  |
| 9  | 2 | 11 | 10 | 11172.5578 | 1.9  |  |  |
| 10 | 2 | 10 | 9  | 12412.7836 | 3.0  |  |  |
| 10 | 2 | 11 | 10 | 12412.9726 | 1.4  |  |  |
| 10 | 2 | 9  | 8  | 12413.2470 | 2.9  |  |  |
| 10 | 2 | 12 | 11 | 12413.4403 | 1.8  |  |  |
